# Supplementary material for: ZFC3H1 prevents RNA trafficking into nuclear speckles through condensation
Source: PubMed Central journal article supplement — Nucleic Acids Res. 2021 Sep 16;49(18):10630–43. doi: 10.1093/nar/gkab774 (PMC8501945; doi:10.1093/nar/gkab774), 2021-09-16
Supplement: gkab774_supplemental_file.pdf [file gkab774_supplemental_file.pdf]

## Supplementary Information

### Supplementary Figures

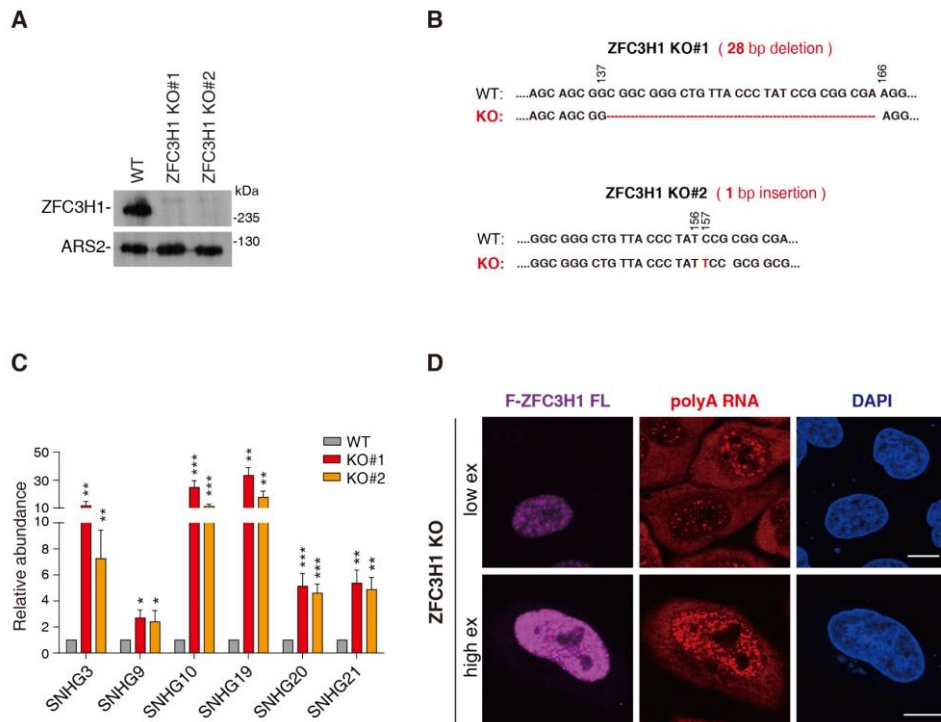

Supplementary Figure S1

**Supplementary Figure S1. Identification of ZFC3H1 KO cells.** (A) Western blots to examine ZFC3H1 expression in WT and ZFC3H1 KO cells. ARS2 was used as a loading control. (B) Genomic sequences of the ZFC3H1 KO cells. The mutated sites are shown in red. (C) RT-qPCRs to examine SNHG RNA levels in WT and ZFC3H1 KO cells. The bars show RNA levels relative to 18S rRNA. Error bars, standard deviations (n=3). Statistical analysis was performed using Student's t test. \*P < 0.05, \*\*P < 0.01, \*\*\*P < 0.001. (D) Confocal microscopic imaging to detect the distribution of polyA RNAs and Flag-ZFC3H1 at different levels in ZFC3H1 KO cells. FISH with an oligo (dT) probe and IF using the Flag antibody were carried out. Scale bar, 10  $\mu$ m.

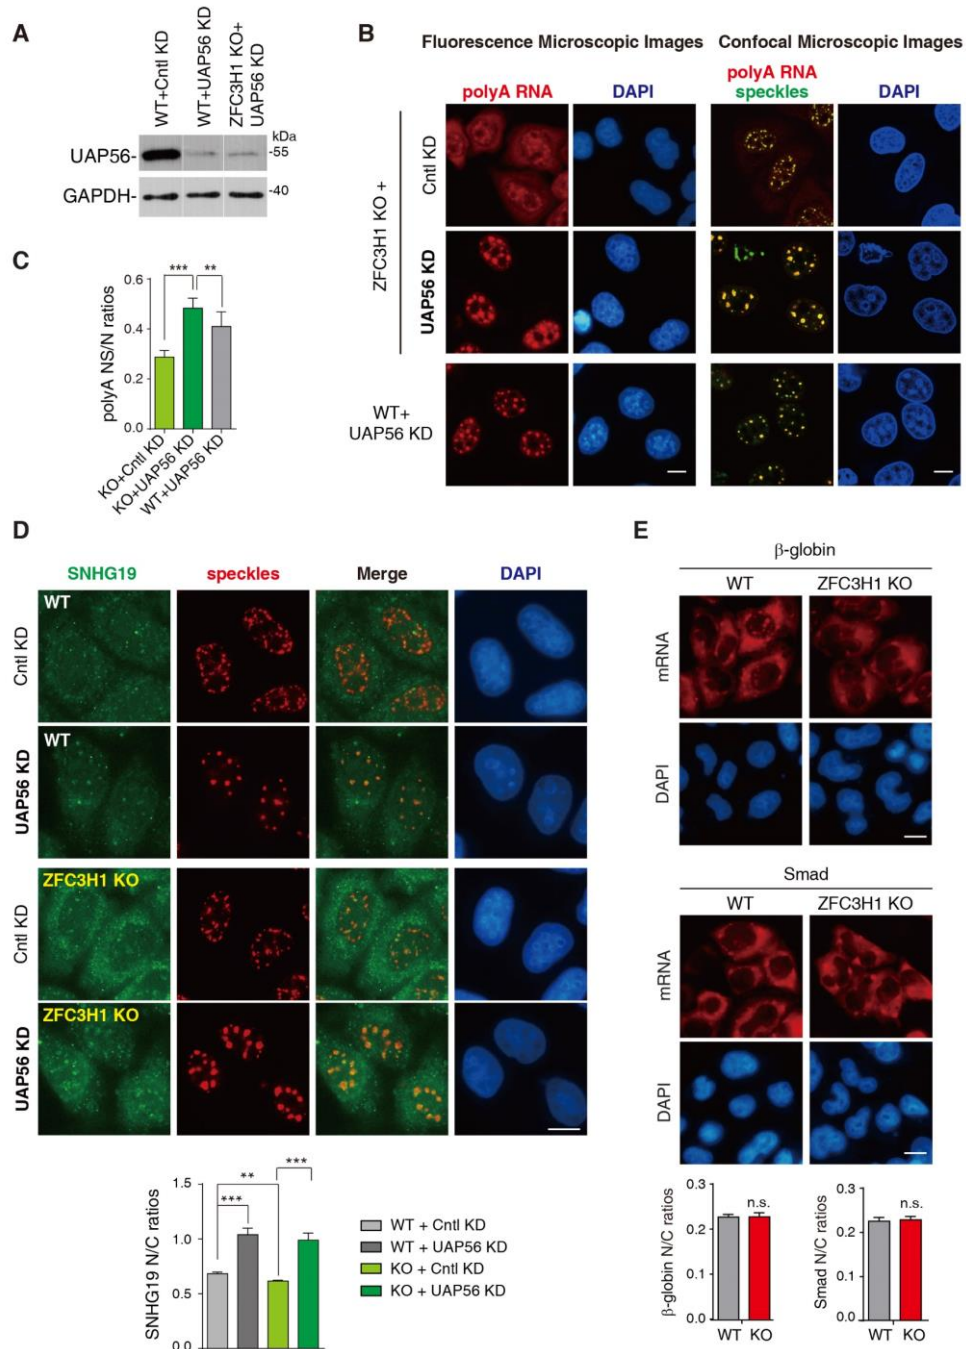

Supplementary Figure S2

**Supplementary Figure S2. ZFC3H1 prevents its target RNAs trafficking into**

NSs. (A) Western blots to examine the KD efficiency of UAP56. GAPDH was used as a loading control. The white line delineates the boundary where irrelevant lanes have been removed from the same blot. (B) (Left) Fluorescence microscopic

imaging to show distribution of polyA RNAs in WT and ZFC3H1 KO cells treated with Cntl or UAP56/URH49 siRNAs. Images were captured with a DP72-CCD camera (Olympus). Scale bar, 10  $\mu$ m. (Right) Confocal microscopic imaging to examine colocalization of polyA RNAs with NSs in the same set of cells as shown in (Left). FISH with an oligo (dT) probe and IF using the SC35 (as a NS marker) antibody were carried out. Confocal imaging was performed on a Leica TCS SP8 WLL. Scale bar, 10  $\mu$ m. (C) Quantification of polyA RNA NS/N ratios in (B). Error bars, standard deviations (n=10). (D) (Top) Confocal microscopic imaging to examine the distribution of SNHG19 RNAs and NSs in WT and ZFC3H1 KO cells treated with Cntl or UAP56/URH49 siRNAs. FISH with an SNHG19-specific probe and IF using the SON (as a NS marker) antibody were carried out. Scale bar, 10  $\mu$ m. (Bottom) Quantification of nuclear (N) and cytoplasmic (C) signals of SNHG19 RNA. N/C ratios of 30 cells were calculated in each experiment. Error bars, standard deviations (n=3). (E) (Top) FISH with a vector probe to detect the distribution of corresponding RNAs in WT and ZFC3H1 KO cells 19 hr after transfection with spliced  $\beta$ -globin or Smad reporter construct. Scale bar, 20  $\mu$ m. (Bottom) Quantification of N/C ratios of corresponding mRNAs. N/C ratios of 40 cells were calculated in each experiment. Error bars, standard deviations (n=3). Statistical analysis was performed using Student's t test. \*P < 0.05, \*\*P < 0.01, \*\*\*P < 0.001, n.s., not significant.

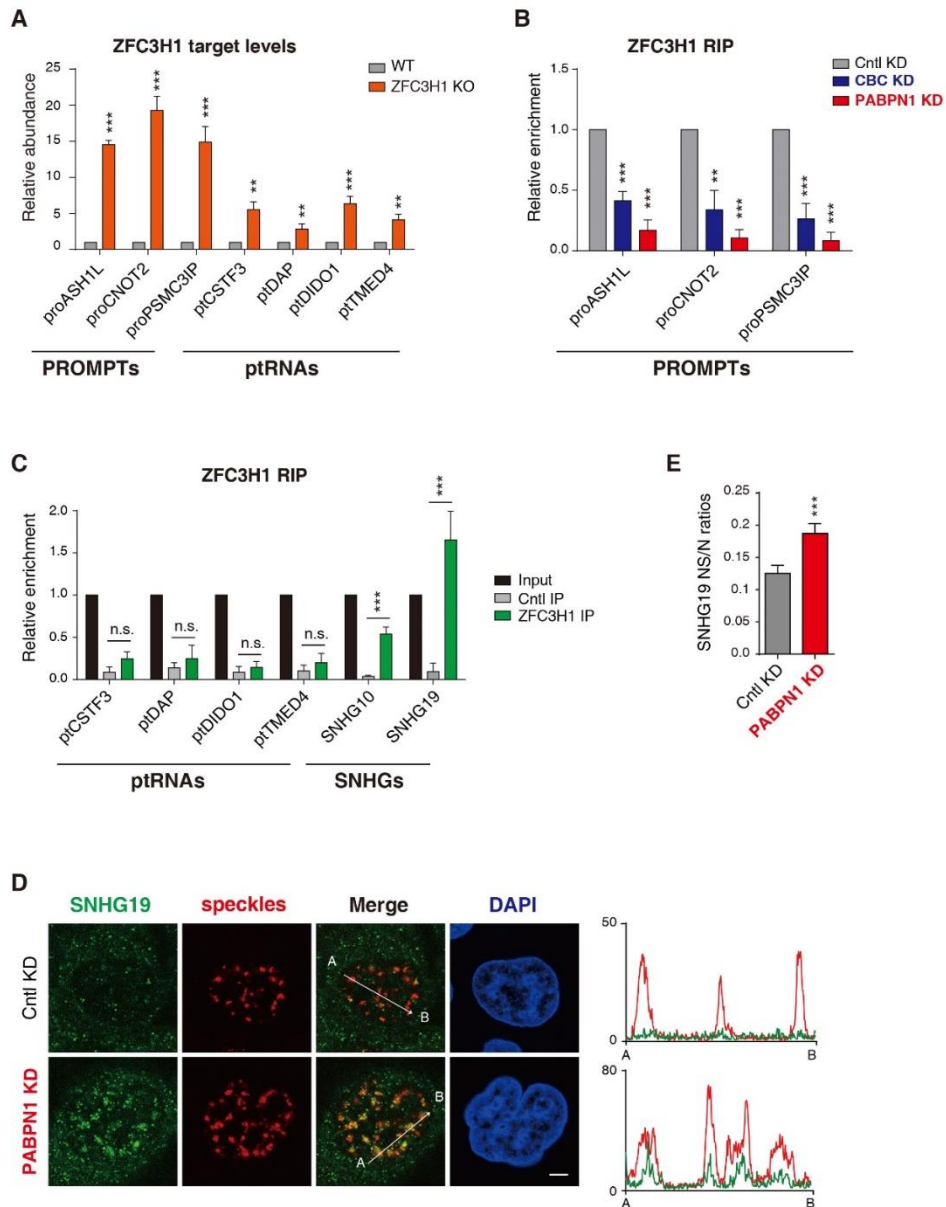

Supplementary Figure S3

**Supplementary Figure S3. PABPN1 facilitates ZFC3H1 recruitment to polyA+ PROMPTs.** (A) RT-qPCRs to detect the levels of polyA+ PROMPTs and ptRNAs in WT and ZFC3H1 KO cells. The bars show RNA levels relative to 18S rRNA. Error bars, standard deviations (n = 3). (B) RNA-IP analysis to examine the association of ZFC3H1 with polyA+ PROMPTs upon CBC or PABPN1 KD. IPs were carried out with a ZFC3H1 antibody in cells treated with Cntl, CBC or PABPN1 siRNAs, followed by RT-qPCRs to detect RNAs. Error bars, standard deviations

(n=3). (C) RNA-IP analysis to examine the association of ZFC3H1 with ptRNAs. IPs were carried out with the Cntl or ZFC3H1 antibody in normal cells, followed by RT-qPCRs to detect RNAs. Error bars, standard deviations (n=3). (D) Confocal microscopic imaging to examine co-localization of SNHG19 RNA with NSs in Cntl and PABPN1 KD cells. FISH with an SNHG19-specific probe and IF using the SON (as a NS marker) antibody were carried out. The green and red lines in the graphs show the intensity of FISH and SON IF signals along the freely positioned arrow indicated from A to B, respectively. Scale bar, 5  $\mu$ m. (E) Quantification of SNHG19 RNA NS/N ratios in (D). Error bars, standard deviations (n=10). Statistical analysis was performed using Student's t test. \*P < 0.05, \*\*P < 0.01, \*\*\*P < 0.001, n.s., not significant.

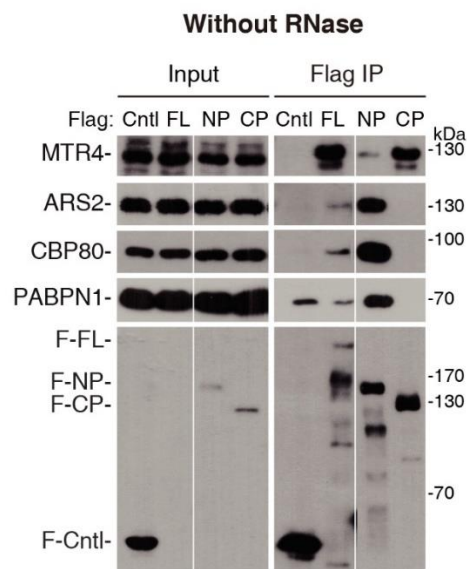

Supplementary Figure S4

**Supplementary Figure S4. The NP of ZFC3H1 associates with CBC and PABPN1, and the CP interacts with MTR4.** Flag IP-WB to examine the

associations of ZFC3H1 fragments with CBC, PABPN1 and MTR4 in the absence of RNase A. The white line delineates the boundary where irrelevant lanes have been removed from the same blot.

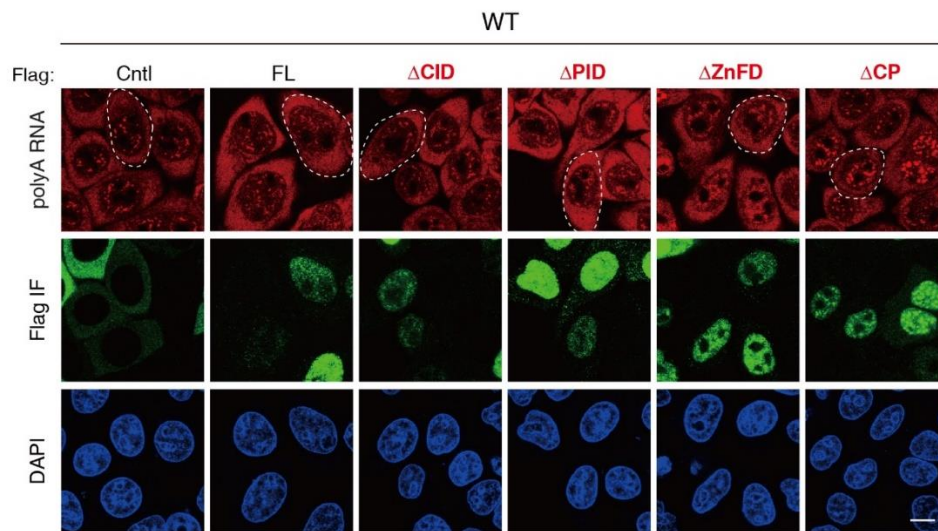

Supplementary Figure S5

**Supplementary Figure S5. The effect of ZFC3H1 FL and mutants on polyA RNA distribution in WT cells.** Confocal microscopic imaging to detect the distribution of polyA RNAs in WT cells expressing indicated ZFC3H1 mutants. FISH with an oligo (dT) probe and IF using the Flag antibody were carried out. The white dashed lines indicate the cells with similarly low expression of ZFC3H1 FL and mutants. Scale bar, 10  $\mu$ m.

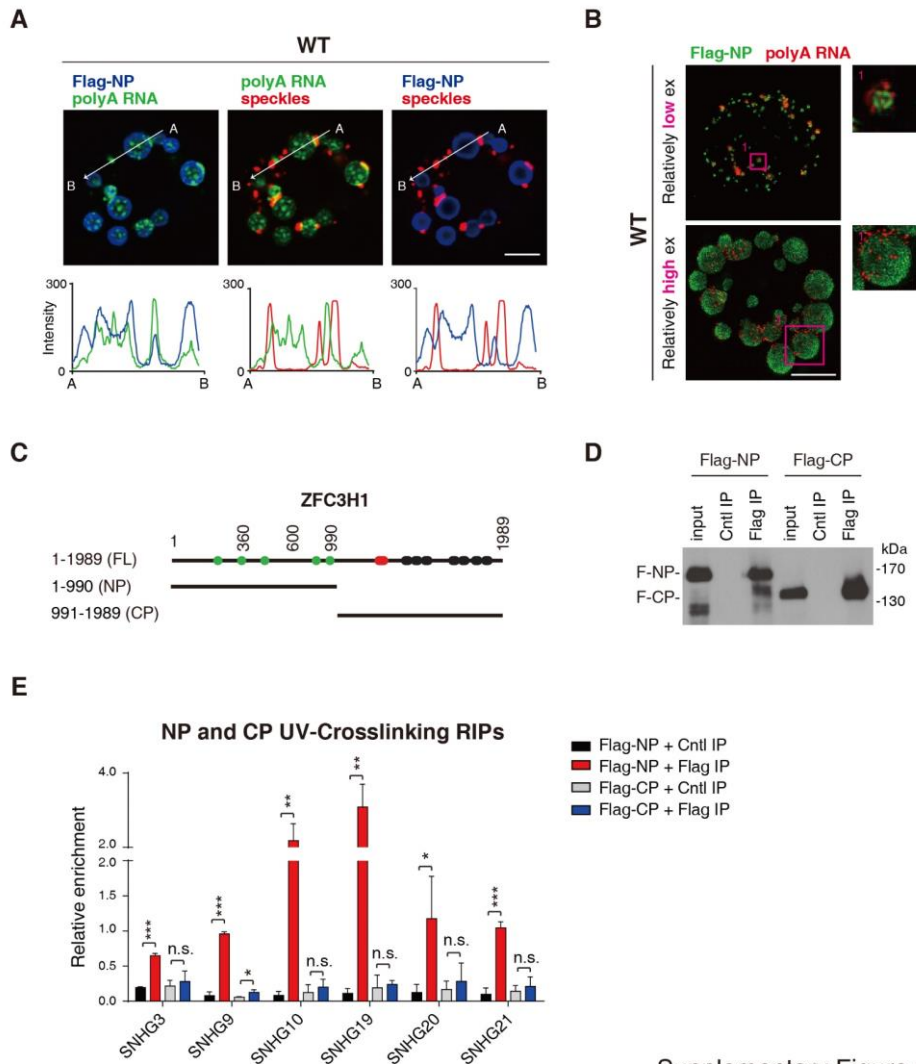

Supplementary Figure S6

**Supplementary Figure S6. ZFC3H1-NP with RNA binding ability forms**

**condensates in nucleoplasmic.** (A) Confocal microscopic imaging to examine the localization of polyA RNAs, ZFC3H1-NP and NSs in WT cells. FISH with an oligo (dT) probe and IF using the SON (as a NS marker) and Flag antibodies were carried out. The green, blue and red lines in the graphs show the intensity of the FISH, Flag IF and SON IF signals along the freely positioned arrow indicated from A to B, respectively. Scale bar, 5  $\mu$ m. (B) SIM imaging to detect the distribution of polyA RNAs and ZFC3H1 in cells expressing Flag-ZFC3H1-NP at different expression levels. FISH with an oligo (dT) probe and IF using the Flag antibody were carried

out. Higher magnification of the boxed regions is shown. Scale bar, 5  $\mu$ m. (C) Domain schematic representation of ZFC3H1. The green, red and black bars indicate coiled-coil, zinc finger and TPR repeat domains, respectively. (D, E) UV-crosslinking RNA-IP analysis to examine the association of ZFC3H1 fragments with SNHG RNAs. IPs were carried out with Cntl or Flag antibody in cells expressing Flag-NP or CP, followed by western blot to detect ZFC3H1 fragments (D) and RT-qPCRs to detect RNAs (E). Error bar, standard deviations (n=3). Statistical analysis was performed using Student's test. \* P<0.05, \*\*P<0.01, \*\*\*P<0.001, n.s., not significant.

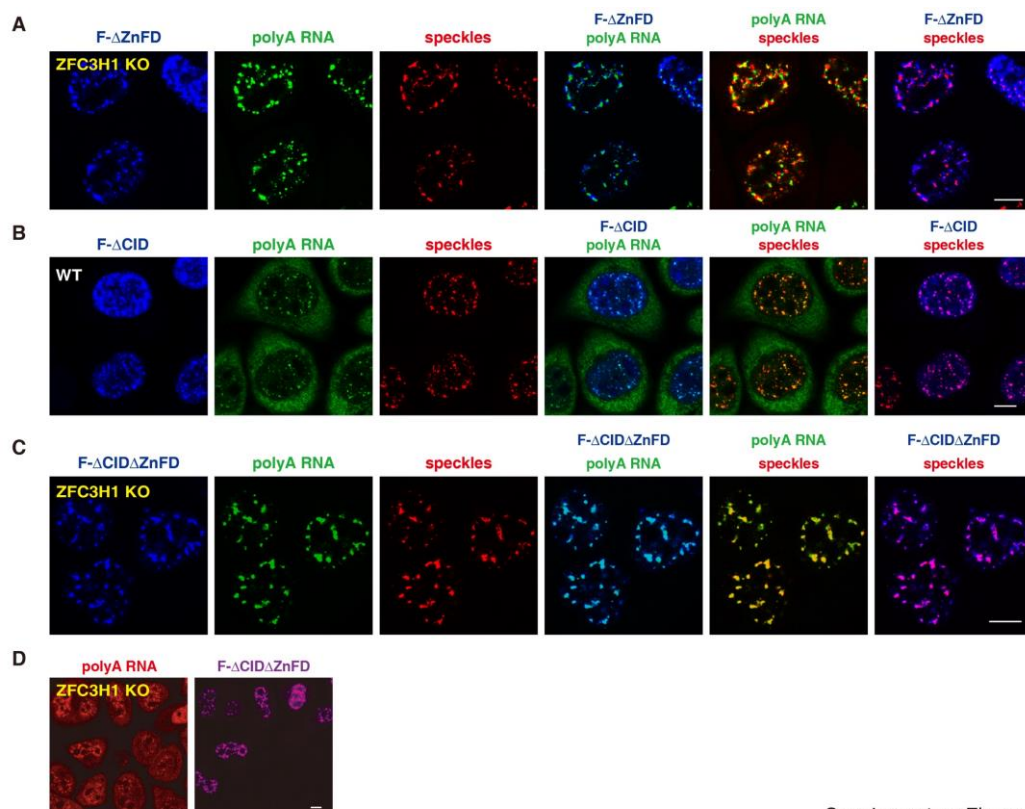

Supplementary Figure S7

**Supplementary Figure S7. The condensation activity of ZFC3H1 is required for retaining target RNAs in the nucleoplasm.** (A-C) Confocal microscopic imaging



to examine multiple cells shown in **Figure. 6 A, C, E.** FISH with an oligo (dT) probe and IF using the SON (as a NS marker) and Flag antibodies were carried out. Scale bar, 10  $\mu$ m. **(D)** Confocal microscopic imaging to examine the localization of polyA RNAs and  $\Delta$ CID $\Delta$ ZnFD mutant in ZFC3H1 KO cells. FISH with an oligo (dT) probe and IF using the Flag antibody were carried out. Scale bar, 10  $\mu$ m.

### Supplementary tables

**Supplementary Table S1** siRNAs and sgRNA used in this study

| <b>siRNAs used in this study</b> |                                      |
|----------------------------------|--------------------------------------|
| <b>Target gene</b>               | <b>Targeting sequence (5' to 3')</b> |
| Cntl                             | CGTACGCGGAATACTTCGA                  |
| ARS2                             | CGACCGCAGTGTTAACATT                  |
| CBP80                            | GCUGAUCUUCCUAAACUACA                 |
| PABPN1                           | AGTCAACCGTGTTACCATA                  |
| UAP56                            | AAGGGCTTGGCTATCACATTT                |
| URH49                            | AAAGGCCTAGCCATCACTTTT                |
| <b>sgRNA used in this study</b>  |                                      |
| ZFC3H1                           | GCGGGCTGTTACCCTATCCG                 |

**Supplementary Table S2** Primers used in this study

| <b>RT-qPCR primers used in this study</b> |         |                        |
|-------------------------------------------|---------|------------------------|
| SNHG3                                     | Forward | CTTCGCATTTTGGCATTGAC   |
| SNHG3                                     | Reverse | TTGCTCCAAGTCTGCCAAAG   |
| SNHG9                                     | Forward | TCCTCTTCACTTAGGACACTGG |
| SNHG9                                     | Reverse | TTGAAAGACGTGGGACAGC    |
| SNHG10                                    | Forward | GTTATTGACTTCCTACCCAGCA |
| SNHG10                                    | Reverse | CTGGAATCAATGAATCACGTTT |
| SNHG19                                    | Forward | CGTCCAGGCCTGGCCTAC     |
| SNHG19                                    | Reverse | GCTCGCGACGAAACCTGC     |
| SNHG20                                    | Forward | GGCATCCAGGTCAGTTTCTG   |
| SNHG20                                    | Reverse | TGGTCAAGAACTAAACCAAACA |
| SNHG21                                    | Forward | CCACGGAGCTGAGGTATATGA  |
| SNHG21                                    | Reverse | AATTGAAGGCAGGGTTTGTG   |
| proASH1L                                  | Forward | TAGGGAGTGAGGCCAGTAGGA  |
| proASH1L                                  | Reverse | TCCAGGTTGGCAACTCAAC    |
| proCNOT2                                  | Forward | GTGGTTTCATCAGAGGGGAACT |
| proCNOT2                                  | Reverse | TGTGCGCGTACTTCAGGG     |
| proPSMC3IP                                | Forward | TTTCGAGACCCAGTTCCAGC   |

|            |         |                           |
|------------|---------|---------------------------|
| proPSMC3IP | Reverse | GTCCTGTGGGGTAACCTTG       |
| ptCSTF3    | Forward | CTGGAAACTGTACATTGAAGCAGAG |
| ptCSTF3    | Reverse | TCCTCCTTGTTCCTAATTGGCTAT  |
| ptDIDO1    | Forward | CCAAACTCTTGCCCTTTGAG      |
| ptDIDO1    | Reverse | TCCTAACTCCTGCTCCCAGA      |
| ptDAP      | Forward | CGGCCCACTACACTAAAGGA      |
| ptDAP      | Reverse | TGAGCATTGAGGCACAAGTC      |
| ptTMED4    | Forward | CAGTTGCTTGATCAGGTGGA      |
| ptTMED4    | Reverse | AGCTGATCTCCCAAGCAGAA      |
| 18S-rRNA   | Forward | CATGGCCGTTCTTAGTTGGT      |
| 18S-rRNA   | Reverse | CGCTGAGCCAGTCAGTGTAG      |

**Supplementary Table S3** Probes used in this study

| <b>probe used in this study</b> |                                                                            |
|---------------------------------|----------------------------------------------------------------------------|
| <b>Name</b>                     | <b>Targeting sequence</b>                                                  |
| Vector Probe                    | AAGGCACGGGGGAGGGGCAAACAACAGATGGCTGG<br>CAACTAGAAGGCACAGTCGAGGCTGATCAGCGGGT |
| SNHG19 probe                    | Antisense sequence of human SNHG19 exon region (1-357 nt)                  |
